# Supplementary material for: Proximity-induced hybridization chain assembly with small-molecule linked DNA for single-step amplified detection of antibodies
Source: Royal Society of Chemistry journal article supplement (doi:10.1039/c9cc01654f), 2019-01-01
Supplement: c9cc01654f1.pdf [file c9cc01654f1.pdf]

## Electronic Supplementary Information (ESI)

# **Proximity-induced hybridization chain assembly with small-molecule linked DNA for single-step amplified detection of antibodies**

Na Li, Lan Liu, Mei-Hao Xiang, Jin-Wen Liu\*, Ru-Qin Yu, and Jian-Hui Jiang\*

Institute of Chemical Biology and Nanomedicine, State Key Laboratory of Chemo/Bio-sensing and Chemometrics, College of Chemistry and Chemical Engineering, Hunan University, Changsha 410082, P. R. China

\* Corresponding authors. E-mail: jinwenliu@hnu.edu.cn; jianhuijiang@hnu.edu.cn.  
Tel: 86-731-88822577; Fax: 86-731-88822872.

***Table of Contents:***

**S-3.** Experiment section

**S-5.** Table S1. Sequences of synthesized DNA probes

**S-6.** Scheme S1. Schematic illustration of the competitive binding assay

**S-7.** Fig. S1. Gel electrophoresis analysis

**S-8.** Fig. S2. Optimization of the I1 and I2 concentration

**S-9.** Fig.S3. Real-time fluorescence assay

**S-10.** Fig. S4. Fluorescence assay

**S-11.** Table. S2. Detection performance comparison

**S-12.** Table S3. Recovery experiments of antibody in serum sample

**S-13.** Reference

## **Experiment section**

### **Chemicals and Materials**

The DNA probes listed in Table S1 were synthesized by Sangon Biotechnology Co., Ltd. (Shanghai, China). Anti-digoxigenin antibody (Dig-Ab), human immunoglobulin G (IgG), anti-PSA antibody (PSA-Ab) and anti-dinitrophenol antibody (DNP-Ab) were obtained from Abcam Co., Ltd (Shanghai, China). Streptavidin (SA), bovine serum albumin (BSA) and digoxigenin were purchased from Sigma-Aldrich (Shanghai, China). All other reagents were analytical grade and used without further purification.

### **Instruments**

The fluorescence spectra were recorded at room temperature in a quartz cuvette on F-7000 fluorescence spectrophotometer (Hitachi, Japan). The real-time fluorescence spectra were obtained in 96-well plates on a C1000 Thermal Cycler (Bio-Rad, Hercules, CA, USA).

### **Gel electrophoresis analysis**

Gel electrophoresis was performed on 3% (w/w) agarose gel containing 0.5  $\mu\text{g/mL}$  ethidium bromide and 0.5  $\mu\text{g/mL}$  gold view at room temperature in  $0.5 \times \text{TBE}$  (44 mmol/L Tris-Boric Acid; 1 mmol/L EDTA). A 10  $\mu\text{L}$  DNA sample was mixed with 1  $\mu\text{L}$   $10 \times$  loading buffer, then the mixture was added in the well of agarose gel. The gels were run at 100 V for 50 min. Then, the gels were visualized using a digital camera under strong UV illumination within Tanon 4200SF gel imaging system.

### **Anti-digoxigenin antibody detection**

All DNA probes were dissolved in  $1 \times \text{PBS}$  buffer. The concentrations were determined by a UV-2450 spectrophotometer (Shimadzu, Japan). In a typical process, different concentrations of Dig-Ab were added into detection solution (40 nM I1, 40 nM I2, 100 nM H1 and 100 nM H2) respectively in  $1 \times \text{PBS}$  buffer (10 mM Phosphate, 137 mM NaCl, 2.7 mM KCl, 5 mM  $\text{MgCl}_2$ , pH 7.4). After incubation for 3 h at 37  $^{\circ}\text{C}$ , the fluorescence spectra were recorded from 500 to 600 nm using an excitation wavelength

of 488 nm.

For the detection of Dig-Ab in complex biological media, Dig-Ab with different final concentrations were added into detection solution containing 10% human serum. The mixture was incubated for 3 h at 37 °C, and then the fluorescence spectra were recorded from 500 to 600 nm using an excitation wavelength of 488 nm.

### **Selectivity analysis**

The selectivity of antibody-responsive hybridization chain assembly for Dig-Ab against other proteins was evaluated as follows: 50 nM Dig-Ab or 500 nM other protein was added into the detection solution, and subsequently incubation for 3 h at 37 °C. The fluorescence spectra were recorded from 500 to 600 nm using an excitation wavelength of 488 nm.

**Table S1.** Sequences of synthesized DNA probes.<sup>a</sup>

| Name | Sequence (5'-3')                                                                     |
|------|--------------------------------------------------------------------------------------|
| I    | TGCTGTGGATCGAGCGGTAGTTGTCA                                                           |
| I1   | Dig-TTTTTTTTTTTTTTTTTTTTTTTTTTTTTTTTTTTTTTTTTTTT<br>TTTCCAGTCTTAGTTGTCA              |
| I2   | TGCTGTGGATCGAGCGGTGACTGGTTTTTTTTTTTTTTTTTTTT<br>TTTTTTTTTTTTTTTTTTTTTTTTTTTTTTTT-Dig |
| H1   | TGACAACTACCGCTCGAT(FAM)CCACAGCAATGCTT<br>CATGCTGTGGAT(BHQ1)CGAGCGGT                  |
| H2   | <u>TGCTGTGGATCGAGCGGTAGTTGTCA</u> <u>ACCGCTCGAT</u><br><u>CCACAGCATGAAGCAT</u>       |

<sup>a</sup> The DNA sequences marked with purple are initiator. Underline sequences indicate complementary regions of the probes to form hairpin structure.

**Scheme S1.** Schematic illustration of the competitive binding assay of programmable hybridization chain assembly.

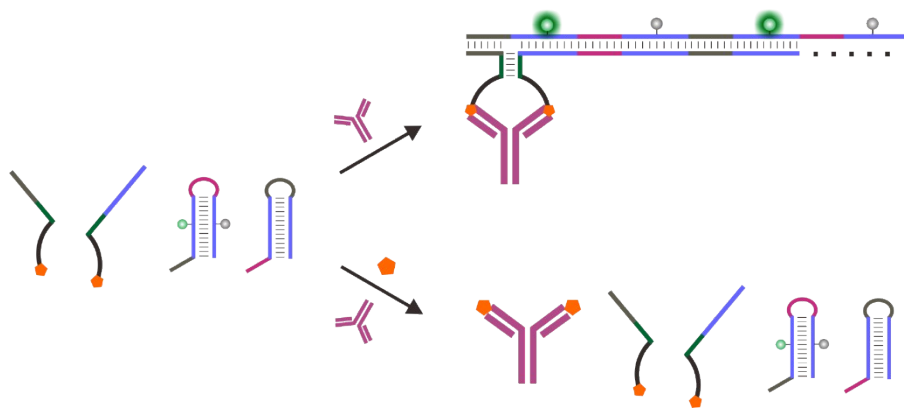

**Fig. S1.** Gel electrophoresis analysis of the binding of I1 and I2 with Dig-Ab. lane 1, DNA marker; lane 2, 8  $\mu$ M I1; lane 3, 8  $\mu$ M I2; Lane 4, 8  $\mu$ M I1 and 8  $\mu$ M I2; lane 5, 8  $\mu$ M I1, 8  $\mu$ M I2 plus 8  $\mu$ M Dig-Ab.

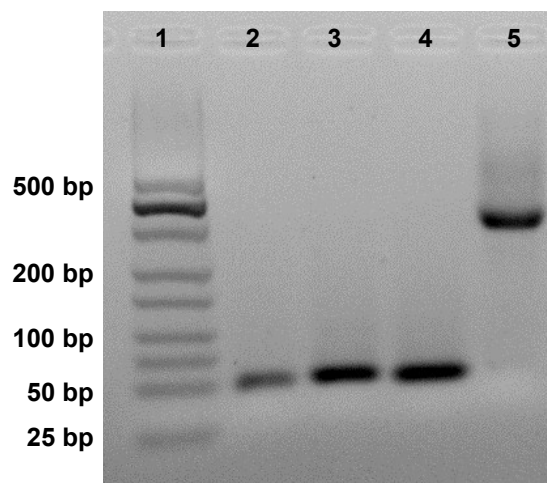

**Fig. S2.** Optimization of the concentration of I1 and I2 (20 nM, 30 nM, 40 nM, 50 nM, 60 nM). The concentration of Dig-Ab was 30 nM.

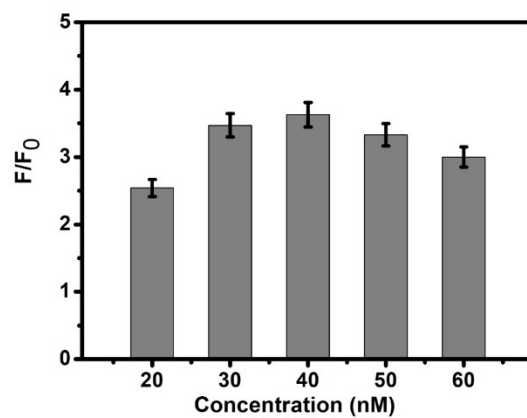

**Fig. S3.** Real-time fluorescence signals reading of antibody-responsive hybridization chain assembly with (red) or without (black) Dig-Ab.

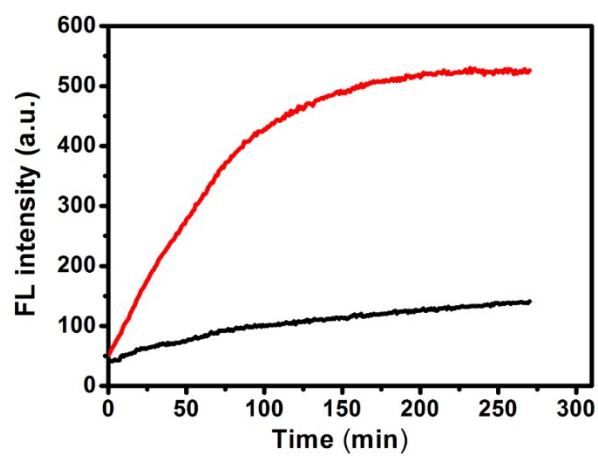

**Fig. S4.** (A) Fluorescence spectral response of free Dig with varying concentrations; (B) Fluorescence intensity versus the concentration of free Dig. The concentrations of Dig-Ab were 50 nM, H1 and H2 were 100 nM, I1 and I2 were 40 nM.

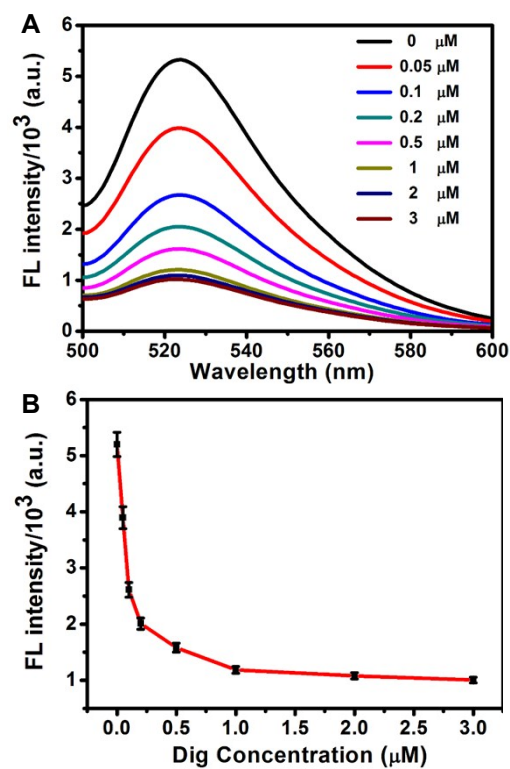

**Table S2.** Comparison of the detection performance toward Dig-Ab with different methods.

| Technique        | Detection limit | Sensing strategy                                      | Reference |
|------------------|-----------------|-------------------------------------------------------|-----------|
| Fluorescence     | 5.6 nM          | Steric hindrance inhibition of strand displacement    | 1         |
| Fluorescence     | 1 nM            | DNA-mediated homogeneous binding assay                | 2         |
| Fluorescence     | 10 nM           | DNA-based beacon conformation-switching               | 3         |
| Fluorescence     | 0.33 nM         | Binding-induced nanoswitch                            | 4         |
| Fluorescence     | 1 nM            | Antibody-templated assembly of RNA structure          | 5         |
| Electrochemistry | 0.67 nM         | DNA-mediated strand displacement                      | 6         |
| Electrochemistry | 1 nM            | Bioelectrochemical switches                           | 7         |
| Electrochemistry | 5 nM            | Target induced signal response                        | 8         |
| Electrochemistry | 10 nM           | Steric hindrance effects                              | 9         |
| Nanopore         | 0.5 nM          | Analyte-triggered triplex molecular beacon nanoswitch | 10        |
| Fluorescence     | 0.032 nM        | Proximity-induced hybridization chain assembly        | This work |

**Table S3.** Recovery experiments of Antibody in serum sample.

| Samples | Spiked Antibody<br>(nM) | Found Antibody<br>(nM) | Recovery<br>(%) | RSD<br>(n=3, %) |
|---------|-------------------------|------------------------|-----------------|-----------------|
| 1       | 5                       | 4.72                   | 94.4            | 2.5             |
| 2       | 10                      | 10.31                  | 103.1           | 3.8             |
| 3       | 25                      | 24.32                  | 97.3            | 2.7             |
| 4       | 35                      | 33.01                  | 94.3            | 4.3             |

## Reference:

1. K. J. Cash, F. Ricci and K. W. Plaxco, *J. Am. Chem. Soc.*, 2009, **131**, 6955-6957.
2. B. Dou, J. Yang, K. Shi, R. Yuan and Y. Xiang, *Biosens. Bioelectron.*, 2016, **83**, 156-161.
3. B. Guo, Y. Sheng, K. Zhou, Q. Liu, L. Liu and H. C. Wu, *Angew. Chem. Int. Ed.*, 2018, **57**, 3602-3606.
4. Y. Peng, X. Li, R. Yuan and Y. Xiang, *Chem. Commun.*, 2016, **52**, 12586-12589.
5. A. Bertucci, A. Porchetta and F. Ricci, *Anal. Chem.*, 2018, **90**, 1049-1053.
6. S. Ranallo, M. Rossetti, K. W. Plaxco, A. Vallée-Bélisle and F. Ricci, *Angew. Chem. Int. Ed.*, 2015, **54**, 13214-13218.
7. Y. Tian, S. Zhang, L. Wang and S. Liu, *ChemBioChem.*, 2018, **19**, 716-722.
8. A. Vallée-Bélisle, F. Ricci, T. Uzawa, F. Xia and K. W. Plaxco, *J. Am. Chem. Soc.*, 2012, **134**, 15197-15200.
9. S. S. Mahshid, S. Camiré, F. Ricci and A. Vallée-Bélisle, *J. Am. Chem. Soc.*, 2015, **137**, 15596-15599.
10. Z. Zhang, C. Hejesen, M. B. Kjelstrup, V. Birkedal and K. V. Gothelf, *J. Am. Chem. Soc.*, 2014, **136**, 11115-11120.
